# Supplementary material
Source: PubMed Central journal article supplement (PMC5554873)
Supplement: NIHMS885620-supplement-supplement_1.pdf [file NIHMS885620-supplement-supplement_1.pdf]

## APPENDIX: Supplementary Tables

Supplementary Table 1: Interaction effects between candidate genes and race for additive risk models for attachment security and disorganization scores, additive genetic models

| Gene             | Security |           |         |          | Disorganization |           |         |          |
|------------------|----------|-----------|---------|----------|-----------------|-----------|---------|----------|
|                  | <i>B</i> | <i>SE</i> | $\beta$ | <i>p</i> | <i>B</i>        | <i>SE</i> | $\beta$ | <i>p</i> |
| DRD2             |          |           |         |          |                 |           |         |          |
| DRD2             | .06      | .49       | .02     | .90      | -.60            | .40       | -.20    | .13      |
| Race             | .47      | .36       | .11     | .20      | -.004           | .29       | -.001   | .99      |
| DRD2 X Race      | .31      | .61       | .07     | .61      | .32             | .49       | .09     | .51      |
| DRD4             |          |           |         |          |                 |           |         |          |
| DRD4             | -.29     | .36       | -.08    | .43      | -.10            | .30       | -.03    | .74      |
| Race             | .54      | .34       | .12     | .11      | -.18            | .28       | -.05    | .54      |
| DRD4 X Race      | .35      | .56       | .06     | .63      | .23             | .45       | .05     | .61      |
| COMT             |          |           |         |          |                 |           |         |          |
| COMT             | -.34     | .35       | -.11    | .33      | .23             | .28       | .09     | .41      |
| Race             | .63      | .36       | .14     | .08      | -.16            | .30       | -.04    | .58      |
| COMT X Race      | .21      | .52       | .04     | .69      | -.46            | .43       | -.11    | .29      |
| Di_5-HTT         |          |           |         |          |                 |           |         |          |
| Di_5-HTT         | -.26     | .34       | -.08    | .45      | -.03            | .28       | -.01    | .93      |
| Race             | .61      | .35       | .14     | .08      | -.26            | .29       | -.07    | .37      |
| Di_5-HTT X Race  | .93      | .49       | .20     | .06      | -.45            | .41       | -.12    | .27      |
| Tri_5-HTT        |          |           |         |          |                 |           |         |          |
| Tri_5-HTT        | .03      | .33       | .01     | .92      | -.10            | .27       | -.04    | .71      |
| Race             | .51      | .34       | .12     | .14      | -.18            | .28       | -.05    | .53      |
| Tri_5-HTT X Race | .56      | .48       | .12     | .25      | .15             | .40       | .04     | .70      |
| OXTR             |          |           |         |          |                 |           |         |          |
| OXTR             | .20      | .32       | .06     | .54      | -.18            | .26       | -.07    | .49      |
| Race             | .53      | .35       | .12     | .13      | -.13            | .28       | -.04    | .65      |
| OXTR X Race      | -.54     | .49       | -.11    | .27      | .57             | .40       | .14     | .16      |

*Note.* Additive models are presented. *B*, changes in security and disorganization scores per unit change in the predictor.

Supplementary Table 2: Interaction effects between candidate genes and race on attachment security and disorganization scores, genetic dominance models

| Gene X Race<br>Gene | Security |           |         |            | Disorganization |           |         |          |
|---------------------|----------|-----------|---------|------------|-----------------|-----------|---------|----------|
|                     | <i>B</i> | <i>SE</i> | $\beta$ | <i>p</i>   | <i>B</i>        | <i>SE</i> | $\beta$ | <i>p</i> |
| DRD2                |          |           |         |            |                 |           |         |          |
| DRD2                | -.07     | .53       | -.02    | .90        | -.56            | .42       | -.15    | .19      |
| Race                | .43      | .45       | .10     | .96        | -.31            | .37       | -.09    | .39      |
| DRD2 X Race         | .24      | .73       | .05     | .74        | .56             | .59       | .13     | .34      |
| DRD4                |          |           |         |            |                 |           |         |          |
| DRD4                | -.56     | .50       | -.12    | .27        | .03             | .41       | .01     | .94      |
| Race                | .35      | .43       | .08     | .41        | -.21            | .36       | -.06    | .57      |
| DRD4 X Race         | .55      | .71       | .10     | .44        | .07             | .58       | .02     | .90      |
| COMT                |          |           |         |            |                 |           |         |          |
| COMT                | -.18     | .48       | -.03    | .72        | .18             | .39       | .04     | .66      |
| Race                | .56      | .35       | .13     | .11        | -.19            | .29       | -.05    | .51      |
| COMT X Race         | -1.04    | 1.10      | -.23    | .35        | .02             | .90       | .01     | .98      |
| Di_5-HTT            |          |           |         |            |                 |           |         |          |
| Di_5-HTT            | -.41     | .51       | -.09    | .42        | .10             | .42       | .03     | .82      |
| Race                | -.20     | .54       | -.05    | .71        | .21             | .44       | .06     | .64      |
| Di_5-HTT X Race     | 1.38     | .71       | .26     | <b>.05</b> | -.78            | .58       | -.18    | .18      |
| Tri_5-HTT           |          |           |         |            |                 |           |         |          |
| Tri_5-HTT           | -.03     | .56       | -.01    | .96        | -.02            | .46       | -.01    | .96      |
| Race                | -.17     | .73       | -.04    | .82        | -.37            | .60       | -.10    | .54      |
| Tri_5-HTT X Race    | .89      | .82       | .19     | .28        | .24             | .68       | .06     | .72      |
| OXTR                |          |           |         |            |                 |           |         |          |
| OXTR                | .29      | .47       | .07     | .54        | .07             | .38       | .02     | .85      |
| Race                | .95      | .46       | .21     | .04        | -.38            | .38       | -.10    | .32      |
| OXTR X Race         | -.96     | .69       | -.17    | .17        | .62             | .57       | .13     | .28      |

Note. Bold coefficients indicate significant at  $p < .05$ .

Supplementary Table 3: Interaction effects between candidate genes and race on attachment security and disorganization scores, heterozygous vs. homozygous genetic association models

| Gene X Race      | Security |           |         |          | Disorganization |           |         |            |
|------------------|----------|-----------|---------|----------|-----------------|-----------|---------|------------|
| Gene             | <i>B</i> | <i>SE</i> | $\beta$ | <i>p</i> | <i>B</i>        | <i>SE</i> | $\beta$ | <i>p</i>   |
| <b>DRD2</b>      |          |           |         |          |                 |           |         |            |
| DRD2             | -.33     | .37       | -.07    | .37      | .07             | .30       | .02     | .81        |
| Race             | .57      | .34       | .13     | .10      | -.16            | .28       | -.04    | .58        |
| DRD2 X Race      | -.23     | .74       | -.04    | .76      | 1.06            | .60       | .22     | .08        |
| <b>DRD4</b>      |          |           |         |          |                 |           |         |            |
| DRD4             | -.37     | .38       | -.08    | .33      | .14             | .31       | .04     | .65        |
| Race             | .58      | .34       | .13     | .10      | -.19            | .28       | -.05    | .51        |
| DRD4 X Race      | .58      | .76       | .10     | .44      | -.29            | .62       | -.06    | .64        |
| <b>COMT</b>      |          |           |         |          |                 |           |         |            |
| COMT             | .26      | .34       | .06     | .45      | .12             | .28       | .03     | .67        |
| Race             | .56      | .34       | .13     | .10      | -.15            | .28       | -.04    | .60        |
| COMT X Race      | -1.08    | .68       | -.19    | .12      | .67             | .56       | .14     | .24        |
| <b>Di_5-HTT</b>  |          |           |         |          |                 |           |         |            |
| Di_5-HTT         | .23      | .35       | .05     | .52      | -.12            | .29       | -.03    | .67        |
| Race             | .57      | .35       | .13     | .10      | -.19            | .28       | -.05    | .50        |
| Di_5-HTT X Race  | .93      | .70       | .16     | .18      | -.74            | .57       | -.15    | .20        |
| <b>Tri_5-HTT</b> |          |           |         |          |                 |           |         |            |
| Tri_5-HTT        | -.07     | .34       | -.02    | .84      | .18             | .28       | .05     | .51        |
| Race             | .54      | .34       | .12     | .12      | -.18            | .28       | -.05    | .53        |
| Tri_5-HTT X Race | .09      | .69       | .02     | .90      | .02             | .56       | .01     | .97        |
| <b>OXTR</b>      |          |           |         |          |                 |           |         |            |
| OXTR             | -.26     | .37       | -.06    | .48      | .66             | .30       | .17     | <b>.03</b> |
| Race             | .52      | .34       | .12     | .13      | -.10            | .28       | -.03    | .72        |
| OXTR X Race      | -.96     | .74       | -.15    | .20      | .18             | .60       | .03     | .77        |

Note. Bold coefficients indicate significant at  $p < .05$ .

Supplementary Table 4: Interaction effects of candidate genes, sensitivity, and race on attachment security and disorganization scores, genetic dominance models

| Gene        | Security           |          |           |         |          | Disorganization |            |           |         |          |            |
|-------------|--------------------|----------|-----------|---------|----------|-----------------|------------|-----------|---------|----------|------------|
|             | $\Delta R^2$       | <i>B</i> | <i>SE</i> | $\beta$ | <i>p</i> | $\Delta R^2$    | <i>B</i>   | <i>SE</i> | $\beta$ | <i>p</i> |            |
| <b>DRD2</b> |                    |          |           |         |          |                 |            |           |         |          |            |
| Step 1      | DRD2               | .03      | .05       | .36     | .01      | .89             | <b>.05</b> | -.25      | .29     | -.07     | .38        |
|             | Sensitivity        |          | .24       | .14     | .15      | .08             |            | -.29      | .11     | -.23     | <b>.01</b> |
|             | Race               |          | .87       | .40     | .19      | <b>.03</b>      |            | -.52      | .33     | -.14     | .11        |
| Step 2      | DRD2 X Sens        | .004     | -.13      | .28     | -.05     | .63             | .02        | .22       | .23     | .11      | .34        |
|             | DRD2 X Race        |          | -.002     | .83     | .00      | .99             |            | .96       | .67     | .22      | .15        |
|             | Sense X Race       |          | .19       | .28     | .08      | .50             |            | -.22      | .22     | -.11     | .32        |
| Step 3      | DRD2 X Sens X Race | .01      | -.72      | .56     | -.22     | .20             | .00        | -.05      | .45     | -.02     | .92        |
| <b>DRD4</b> |                    |          |           |         |          |                 |            |           |         |          |            |
| Step 1      | DRD4               | .04      | -.22      | .35     | -.05     | .53             | <b>.05</b> | -.01      | .43     | .003     | .98        |
|             | Sensitivity        |          | .24       | .14     | .16      | .07             |            | -.30      | .11     | -.24     | <b>.01</b> |
|             | Race               |          | .91       | .39     | .20      | <b>.02</b>      |            | -.63      | .32     | -.17     | <b>.05</b> |
| Step 2      | DRD4 X Sens        | .02      | -.46      | .28     | -.19     | .10             | .01        | .01       | .22     | .003     | .98        |
|             | DRD4 X Race        |          | -.01      | .82     | -.002    | .99             |            | -.08      | .68     | -.02     | .91        |
|             | Sense X Race       |          | .23       | .27     | .10      | .40             |            | -.22      | .22     | -.11     | .32        |
| Step 3      | DRD4 X Sens X Race | .001     | .19       | .55     | .06      | .73             | .004       | -.39      | .45     | -.14     | .39        |
| <b>COMT</b> |                    |          |           |         |          |                 |            |           |         |          |            |
| Step 1      | COMT               | .04      | -.29      | .48     | -.05     | .55             | <b>.05</b> | .27       | .38     | .05      | .48        |
|             | Sensitivity        |          | .26       | .13     | .17      | .06             |            | -.30      | .11     | -.24     | <b>.01</b> |
|             | Race               |          | .95       | .40     | .21      | <b>.02</b>      |            | -.66      | .33     | -.18     | <b>.05</b> |
| Step 2      | COMT X Sens        | .01      | -.01      | .35     | -.01     | .97             | .01        | -.21      | .28     | -.15     | .46        |
|             | COMT X Race        |          | -1.22     | 1.26    | -.27     | .34             |            | -.18      | 1.04    | -.05     | .86        |
|             | Sense X Race       |          | .22       | .28     | .09      | .43             |            | -.16      | .23     | -.08     | .48        |
| Step 3      | COMT X Sens X Race | .00      | .06       | .81     | .02      | .94             | .001       | -.23      | .66     | -.11     | .73        |

Note. Bold coefficients indicate significant at  $p < .05$ . Sen: maternal sensitivity across 6 months and age 1.

Supplementary Table 4. *Continued.*

| Gene                       |                                    | $\Delta R^2$ | Security |           |         | Disorganization |              |          |           |         |            |
|----------------------------|------------------------------------|--------------|----------|-----------|---------|-----------------|--------------|----------|-----------|---------|------------|
|                            |                                    |              | <i>B</i> | <i>SE</i> | $\beta$ | <i>p</i>        | $\Delta R^2$ | <i>B</i> | <i>SE</i> | $\beta$ | <i>p</i>   |
| <b>Di_5-HTT</b>            |                                    |              |          |           |         |                 |              |          |           |         |            |
| Step 1                     | Di_5-HTT                           | .04          | .24      | .36       | .05     | .49             | <b>.05</b>   | -.23     | .29       | -.06    | .43        |
|                            | Sensitivity                        |              | .24      | .13       | .16     | .07             |              | -.29     | .11       | -.23    | <b>.01</b> |
|                            | Race                               |              | .95      | .40       | .21     | <b>.02</b>      |              | -.67     | .32       | -.18    | <b>.04</b> |
|                            | Sense X Race                       |              | .17      | .27       | .07     | .78             |              | -.15     | .22       | -.08    | .30        |
| Step 2                     | Di_5-HTT X Sens                    | .03          | .08      | .28       | .04     | .07             | .02          | .24      | .23       | .15     | .49        |
|                            | Di_5-HTT X Race                    |              | 1.49     | .80       | .28     | .54             |              | -.45     | .65       | -.10    | .50        |
| Step 3                     | Di_5-HTT X Sens X Race             | .02          | .95      | .56       | .29     | .09             | .01          | -.42     | .46       | -.16    | .36        |
| <b>Tri_5-HTT</b>           |                                    |              |          |           |         |                 |              |          |           |         |            |
| Step 1                     | Tri_5-HTT                          | .04          | .29      | .41       | .05     | .48             | <b>.05</b>   | .20      | .34       | .05     | .56        |
|                            | Sensitivity                        |              | .24      | .14       | .16     | .08             |              | -.31     | .11       | -.25    | <b>.01</b> |
|                            | Race                               |              | .87      | .39       | .20     | <b>.03</b>      |              | -.64     | .32       | -.17    | <b>.05</b> |
|                            | Sense X Race                       |              | .15      | .27       | .06     | .77             |              | -.25     | .22       | -.13    | .17        |
| Step 2                     | Tri_5-HTT X Sens                   | .01          | .10      | .34       | .06     | .32             | .02          | .39      | .28       | .28     | .26        |
|                            | Tri_5-HTT X Race                   |              | .98      | .97       | .21     | .58             |              | .89      | .79       | .24     | .25        |
| Step 3                     | Tri_5-HTT X Sens X Race            | .01          | .64      | .71       | .25     | .37             | .001         | -.25     | .22       | -.13    | .74        |
| <b>OXTR</b>                |                                    |              |          |           |         |                 |              |          |           |         |            |
| Step 1                     | OXTR                               | .03          | -.12     | .35       | -.03    | .73             | <b>.05</b>   | .32      | .28       | .09     | .25        |
|                            | Sensitivity                        |              | .23      | .14       | .15     | .09             |              | -.28     | .11       | -.23    | <b>.01</b> |
|                            | Race                               |              | .86      | .40       | .19     | <b>.03</b>      |              | -.52     | .32       | -.14    | .11        |
| Step 2                     | OXTR X Sens                        | .04          | -.50     | .28       | -.21    | .08             | .03          | .31      | .23       | .16     | .19        |
|                            | OXTR X Race                        |              | -1.81    | .80       | -.31    | <b>.03</b>      |              | 1.24     | .65       | .26     | .06        |
|                            | Sense X Race                       |              | .02      | .28       | .01     | .96             |              | -.12     | .23       | -.06    | .61        |
| Step 3                     | OXTR X Sens X Race                 | .01          | -.65     | .57       | -.16    | .25             | .001         | .20      | .46       | .06     | .66        |
| <b>COMT<sub>homo</sub></b> |                                    |              |          |           |         |                 |              |          |           |         |            |
| Step 1                     | COMT <sub>homo</sub>               | .04          | .23      | .34       | .05     | .50             | <b>.05</b>   | .15      | .28       | .04     | .59        |
|                            | Sensitivity                        |              | .24      | .13       | .16     | .07             |              | -.30     | .11       | -.24    | <b>.01</b> |
|                            | Race                               |              | .91      | .39       | .21     | <b>.02</b>      |              | -.59     | .32       | -.16    | .07        |
| Step 2                     | COMT <sub>homo</sub> X Sens        | .02          | .20      | .27       | .09     | .46             | .01          | -.01     | .22       | -.01    | .95        |
|                            | COMT <sub>homo</sub> X Race        |              | -.71     | .79       | -.13    | .37             |              | .57      | .65       | .12     | .38        |
|                            | Sense X Race                       |              | .23      | .27       | .10     | .39             |              | -.21     | .22       | -.11    | .35        |
| Step 3                     | COMT <sub>homo</sub> X Sens X Race | .00          | .35      | .54       | .10     | .52             | .001         | .47      | .44       | .16     | .29        |

Supplementary Table 5: Interaction effects of candidate genes, overtly negative behavior, and race on attachment security and disorganization scores, genetic dominance models

| Gene            |                                     | Security     |          |           |         |            | Disorganization |          |           |         |            |
|-----------------|-------------------------------------|--------------|----------|-----------|---------|------------|-----------------|----------|-----------|---------|------------|
|                 |                                     | $\Delta R^2$ | <i>B</i> | <i>SE</i> | $\beta$ | <i>p</i>   | $\Delta R^2$    | <i>B</i> | <i>SE</i> | $\beta$ | <i>p</i>   |
| <b>DRD2</b>     |                                     |              |          |           |         |            |                 |          |           |         |            |
| Step 1          | DRD2                                | .04          | .07      | .36       | .02     | .84        | .04             | -.29     | .29       | -.08    | .32        |
|                 | Overtly negative maternal behavior  |              | -.13     | .06       | -.17    | <b>.03</b> |                 | .11      | .05       | .17     | <b>.03</b> |
|                 | Race                                |              | .61      | .35       | .14     | .09        |                 | -.16     | .29       | -.04    | .57        |
| Step 2          | DRD2 X Maternal behavior            | .00          | .02      | .14       | .02     | .89        | .01             | -.02     | .12       | -.02    | .88        |
|                 | DRD2 X Race                         |              | .30      | .73       | .06     | .69        |                 | .51      | .59       | .12     | .39        |
|                 | Maternal behavior X Race            |              | -.01     | .14       | -.01    | .95        |                 | .04      | .11       | .04     | .74        |
| Step 3          | DRD2 X Maternal behavior X Race     | .00          | -.00     | .29       | -.00    | .99        | .00             | .28      | .24       | .23     | .24        |
| <b>DRD4</b>     |                                     |              |          |           |         |            |                 |          |           |         |            |
| Step 1          | DRD4                                | .05          | -.23     | .35       | -.05    | .51        | .03             | .03      | .29       | .01     | .91        |
|                 | Overtly negative maternal behavior  |              | -.13     | .06       | -.17    | <b>.02</b> |                 | .11      | .05       | .17     | <b>.03</b> |
|                 | Race                                |              | .66      | .34       | .15     | .06        |                 | -.26     | .28       | -.07    | .35        |
| Step 2          | DRD4 X Maternal behavior            | .01          | .18      | .12       | .15     | .15        | .01             | -.08     | .10       | -.08    | .43        |
|                 | DRD4 X Race                         |              | .30      | .71       | .05     | .68        |                 | .25      | .59       | .05     | .68        |
|                 | Maternal behavior X Race            |              | .03      | .12       | .03     | .80        |                 | .00      | .10       | .00     | .99        |
| Step 3          | DRD4 X Maternal behavior X Race     | .00          | -.00     | .25       | -.00    | .99        | .01             | -.19     | .21       | -.11    | .37        |
| <b>COMT</b>     |                                     |              |          |           |         |            |                 |          |           |         |            |
| Step 1          | COMT                                | .05          | -.28     | .48       | -.05    | .57        | .03             | .25      | .39       | .05     | .53        |
|                 | Overtly negative maternal behavior  |              | -.14     | .06       | -.18    | <b>.02</b> |                 | .11      | .05       | .17     | <b>.02</b> |
|                 | Race                                |              | .68      | .35       | .15     | <b>.05</b> |                 | -.29     | .29       | -.08    | .32        |
| Step 2          | COMT X Maternal behavior            | .02          | .22      | .12       | .21     | .06        | .01             | -.10     | .10       | -.12    | .30        |
|                 | COMT X Race                         |              | -.30     | .50       | -.05    | .55        |                 | .43      | .41       | .09     | .30        |
|                 | Maternal behavior X Race            |              | -.01     | .12       | -.01    | .94        |                 | .02      | .10       | .02     | .86        |
| Step 3          | COMT X Maternal behavior X Race     | .00          | .00      | .23       | .00     | .99        | .00             | .09      | .19       | .07     | .64        |
| <b>Di_5-HTT</b> |                                     |              |          |           |         |            |                 |          |           |         |            |
| Step 1          | Di_5-HTT                            | .05          | .23      | .35       | .05     | .51        | .04             | -.25     | .29       | -.07    | .38        |
|                 | Overtly negative maternal behavior  |              | -.13     | .06       | -.17    | <b>.03</b> |                 | .10      | .05       | .17     | <b>.03</b> |
|                 | Race                                |              | .70      | .35       | .16     | <b>.05</b> |                 | -.32     | .29       | -.09    | .27        |
| Step 2          | Di_5-HTT X Maternal behavior        | .03          | -.15     | .12       | -.15    | .22        | .01             | .07      | .10       | .08     | .51        |
|                 | Di_5-HTT X Race                     |              | 1.44     | .71       | .27     | <b>.04</b> |                 | -.79     | .58       | -.18    | .18        |
|                 | Maternal behavior X Race            |              | -.04     | .12       | -.04    | .76        |                 | .03      | .10       | .04     | .74        |
| Step 3          | Di_5-HTT X Maternal behavior X Race | .00          | -.15     | .25       | -.09    | .54        | .00             | -.16     | .21       | -.10    | .45        |

Supplementary Table 5. *Continued.*

| Gene                      |                                                | $\Delta R^2$ | Security |           |         |                         | Disorganization |          |           |         |            |
|---------------------------|------------------------------------------------|--------------|----------|-----------|---------|-------------------------|-----------------|----------|-----------|---------|------------|
|                           |                                                |              | <i>B</i> | <i>SE</i> | $\beta$ | <i>p</i>                | $\Delta R^2$    | <i>B</i> | <i>SE</i> | $\beta$ | <i>p</i>   |
| <b>Tri_5-HTT</b>          |                                                |              |          |           |         |                         |                 |          |           |         |            |
| Step 1                    | Tri_5-HTT                                      | .05          | .25      | .41       | .05     | .54                     | .03             | .19      | .34       | .04     | .57        |
|                           | Overtly negative maternal behavior             |              | -.13     | .06       | -.17    | <b>.03</b>              |                 | .11      | .05       | .17     | <b>.03</b> |
|                           | Race                                           |              | .62      | .34       | .14     | .07                     |                 | -.26     | .28       | -.07    | .36        |
| Step 2                    | Tri_5-HTT X Maternal behavior                  | .01          | -.10     | .13       | -.11    | .47                     | .00             | .03      | .11       | .03     | .82        |
|                           | Tri_5-HTT X Race                               |              | .97      | .83       | .21     | .24                     |                 | .24      | .69       | .06     | .73        |
|                           | Maternal behavior X Race                       |              | .01      | .12       | .01     | .97                     |                 | .02      | .10       | .02     | .83        |
| Step 3                    | Tri_5-HTT X Maternal behavior X Race           | .00          | .06      | .26       | .04     | .83                     | .01             | -.29     | .22       | -.27    | .18        |
| <b>OXTR</b>               |                                                |              |          |           |         |                         |                 |          |           |         |            |
| Step 1                    | OXTR                                           | .04          | -.07     | .35       | -.02    | .84                     | .04             | .29      | .28       | .08     | .30        |
|                           | Overtly negative maternal behavior             |              | -.13     | .06       | -.16    | <b>.04</b>              |                 | .10      | .05       | .16     | <b>.04</b> |
|                           | Race                                           |              | .61      | .35       | .14     | .08                     |                 | -.18     | .28       | -.05    | .54        |
| Step 2                    | OXTR X Maternal behavior                       | .03          | .21      | .12       | .20     | .09                     | .01             | -.06     | .10       | -.07    | .55        |
|                           | OXTR X Race                                    |              | -1.01    | .70       | -.18    | .15                     |                 | .57      | .58       | .12     | .33        |
|                           | Maternal behavior X Race                       |              | .01      | .12       | .01     | .92                     |                 | .01      | .10       | .01     | .92        |
| Step 3                    | OXTR X Maternal behavior X Race                | .00          | -.06     | .25       | -.04    | .81                     | .01             | .22      | .20       | .17     | .29        |
| <b>COMT<sub>hom</sub></b> |                                                |              |          |           |         |                         |                 |          |           |         |            |
| Step 1                    | COMT <sub>hom</sub>                            | <b>.05</b>   | .28      | .34       | .06     | .41                     | .03             | .10      | .28       | .03     | .72        |
|                           | Overtly negative maternal behavior             |              | -.13     | .06       | -.17    | <b>.02</b>              |                 | .11      | .05       | .17     | <b>.03</b> |
|                           | Race                                           |              | .67      | .34       | .15     | <b>.05</b>              |                 | -.23     | .28       | -.06    | .41        |
| Step 2                    | COMT <sub>hom</sub> X Maternal behavior        | .04          | .23      | .11       | .22     | <b>.05</b> <sup>1</sup> | .01             | -.10     | .10       | -.12    | .28        |
|                           | COMT <sub>hom</sub> X Race                     |              | -1.17    | .68       | -.21    | .09                     |                 | .68      | .56       | .15     | .23        |
|                           | Maternal behavior X Race                       |              | -.01     | .11       | -.01    | .92                     |                 | .02      | .10       | .02     | .86        |
| Step 3                    | COMT <sub>hom</sub> X Maternal behavior X Race | .00          | -.04     | .23       | -.03*   | .85                     | .00             | .11      | .19       | .09     | .58        |

*Note.* Bold coefficients indicate significant at  $p < .05$ . Maternal behavior: Overtly negative maternal behavior across 6 months and age 1.

<sup>1</sup>The interaction between COMT<sub>hom</sub> and negative maternal behavior was not statistically significant in a model that did not include race suggesting this may be a suppressor effect. Nevertheless, we interpreted the interaction. Overtly negative maternal behavior was associated with lower attachment security for COMT homozygous infants ( $\beta = -.31$ ,  $p < .01$ ) but was not for COMT heterozygous infants ( $\beta = -.01$ ,  $p > .05$ ).

Supplementary Table 6: Main effects of candidate genes on emotional distress by group, genetic dominance models

| Gene      | <i>Full Sample</i> |                  | <i>European American</i> |                  | <i>African American</i> |                  |
|-----------|--------------------|------------------|--------------------------|------------------|-------------------------|------------------|
|           | $r_{\text{dom}}$   | $p_{\text{dom}}$ | $r_{\text{dom}}$         | $p_{\text{dom}}$ | $r_{\text{dom}}$        | $p_{\text{dom}}$ |
| DRD2      | -.004              | .96              | -.07                     | .51              | .06                     | .59              |
| DRD4      | .08                | .31              | .09                      | .41              | .01                     | .96              |
| COMT      | .05                | .52              | .02                      | .87              | .13                     | .26              |
| Di_5-HTT  | .09                | .24              | .09                      | .40              | .06                     | .60              |
| Tri_5-HTT | .02                | .78              | .10                      | .34              | -.08                    | .45              |
| OXTR      | -.09               | .26              | -.15                     | .16              | .04                     | .73              |
| Mean $r$  | .02                |                  | .01                      |                  | .04                     |                  |



Supplementary Table 7: Interaction effects between candidate genes and race on emotional distress, genetic dominance models

| Gene X Race<br>Gene | Emotional distress |           |          |
|---------------------|--------------------|-----------|----------|
|                     | <i>B</i>           | <i>SE</i> | <i>p</i> |
| DRD2                |                    |           |          |
| DRD2                | -.03               | .33       | .94      |
| Race                | -.11               | .32       | .72      |
| DRD2 X Race         | -.21               | .25       | .81      |
| DRD4                |                    |           |          |
| DRD4                | .20                | .32       | .53      |
| Race                | -.15               | .31       | .62      |
| DRD4 X Race         | -.43               | .26       | .10      |
| COMT                |                    |           |          |
| COMT                | .31                | .44       | .48      |
| Race                | -.21               | .32       | .51      |
| COMT X Race         | 1.14               | 1.23      | .35      |
| Di_5-HTT            |                    |           |          |
| Di_5-HTT            | .32                | .33       | .33      |
| Race                | -.07               | .32       | .84      |
| Di_5-HTT X Race     | -.16               | .65       | .81      |
| Tri_5-HTT           |                    |           |          |
| Tri_5-HTT           | .08                | .38       | .84      |
| Race                | -.14               | .31       | .65      |
| Tri_5-HTT X Race    | -.91               | .75       | .23      |
| OXTR                |                    |           |          |
| OXTR                | -.26               | .32       | .42      |
| Race                | -.16               | .31       | .62      |
| OXTR X Race         | .77                | .63       | .23      |
